# Supplementary material for: Auditory Mismatch Negativity in Youth Affected by Autism Spectrum Disorder With and Without Attenuated Psychosis Syndrome
Source: Frontiers journal article supplement (doi:10.3389/fpsyt.2020.555340), 2020-11-24
Supplement: Data_Sheet_1.PDF [file Data_Sheet_1.PDF]

## Methods and main results

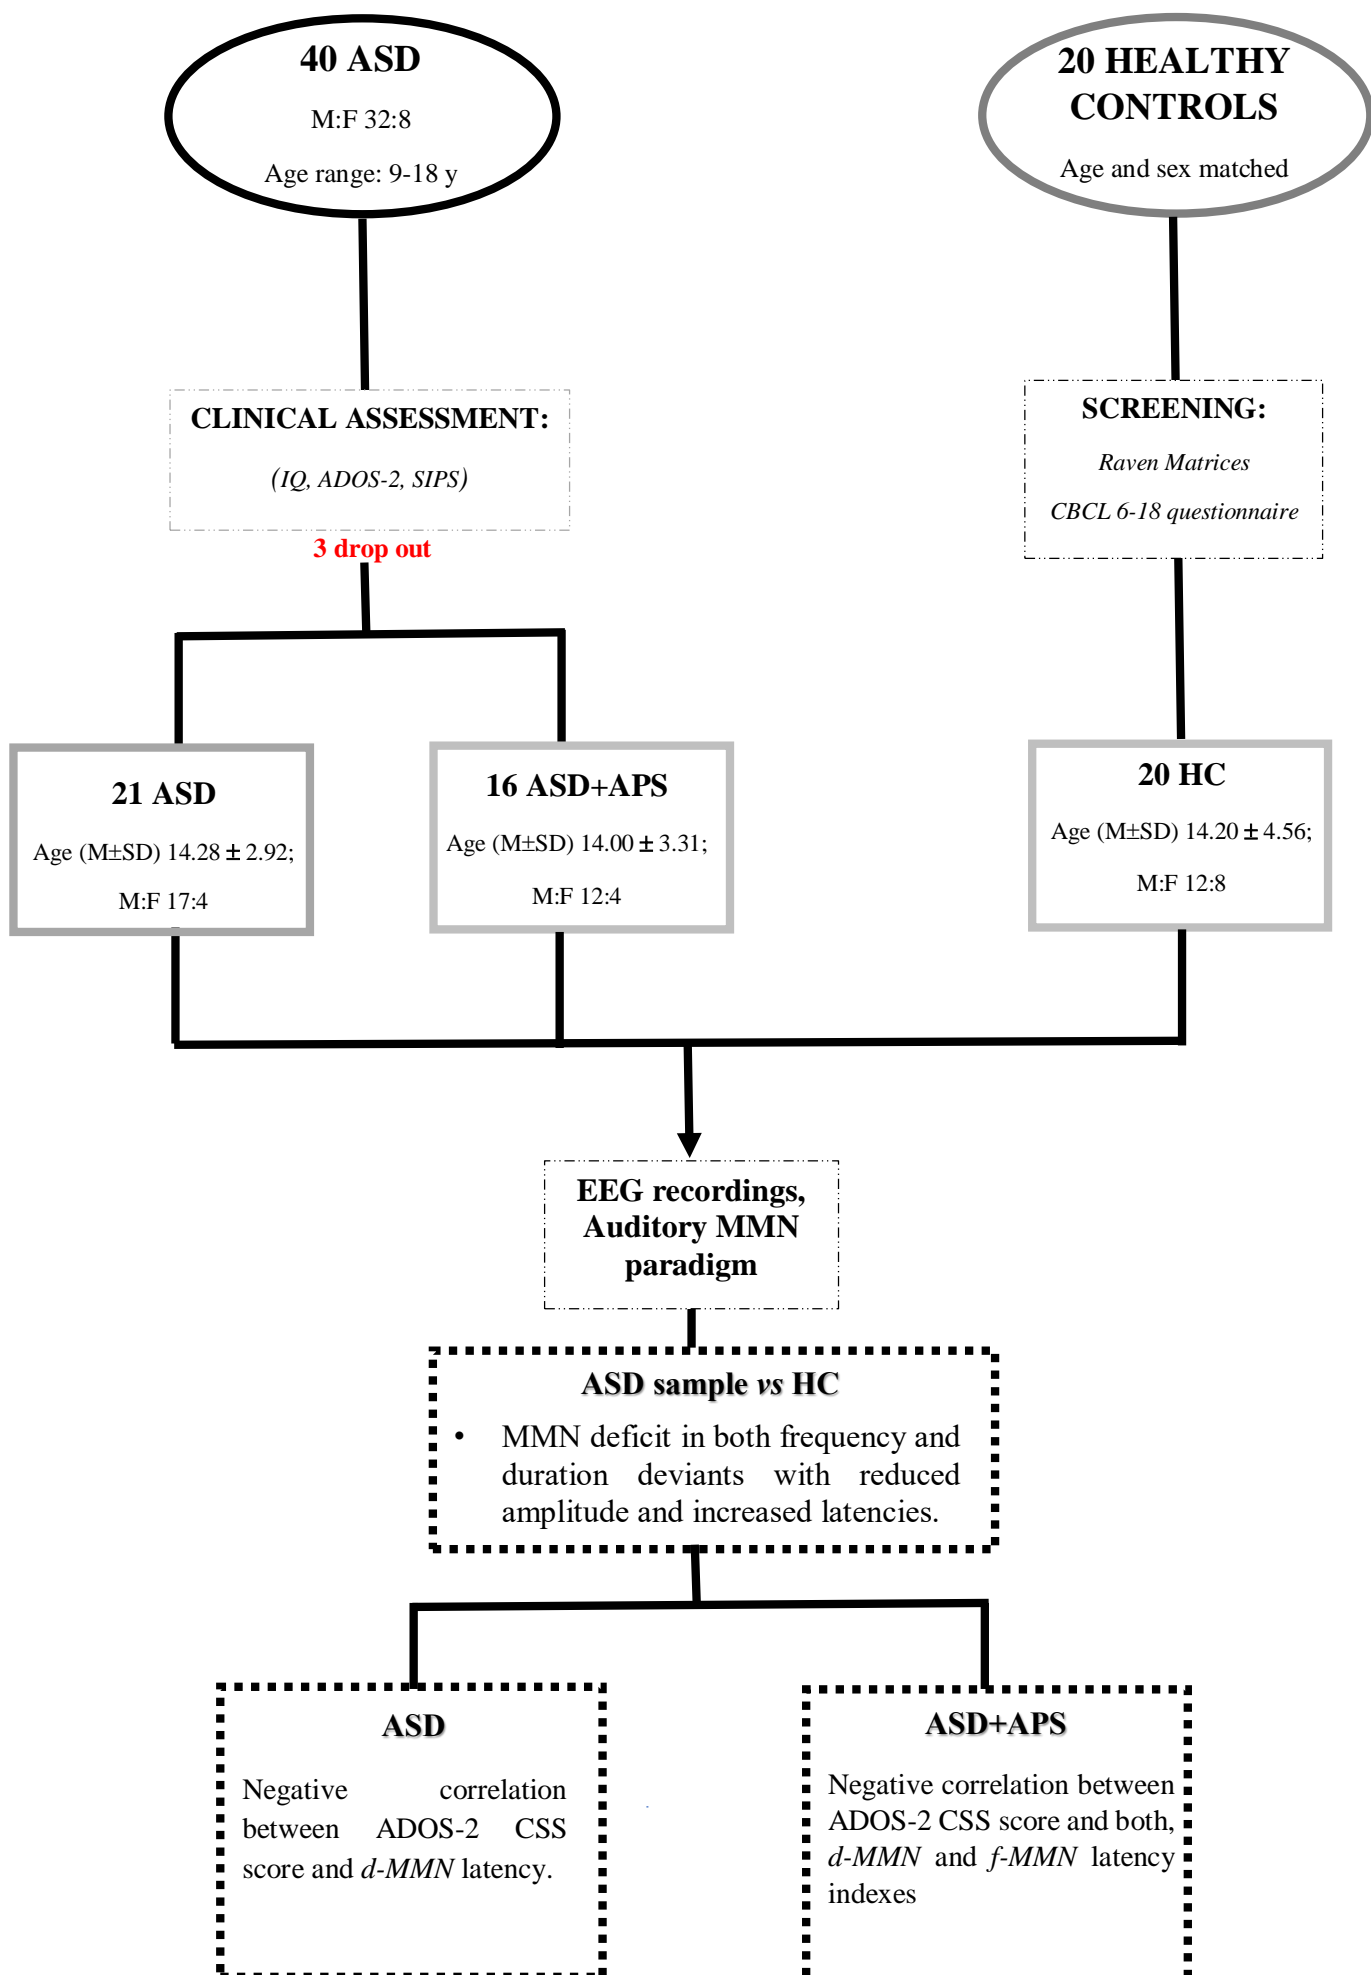

**Legend:**

ASD: Autism Spectrum Disorder

APS: Attenuated Psychosis Syndrome

HC: Healthy Controls

MMN: Mismatch Negativity

fMMN: Mismatch Negativity frequency deviant

dMMN: Mismatch Negativity duration deviant

IQ: Intelligence Quotient

ADOS-2: Autism Diagnostic Observation Schedule – Second Edition ADOS-2

SIPS: Structured Interview for Prodromal Syndromes

CBCL 6-18 years: *Child Behaviour Checklist 6-18 years*
